# Supplementary material for: Exacerbation of the 2013–2016 Pan‐Caribbean Drought by Anthropogenic Warming
Source: PubMed Central journal article supplement — Geophys Res Lett. 2018 Oct 7;45(19):10619–26. doi: 10.1029/2018GL079408 (PMC6282810; doi:10.1029/2018gl079408), 2018-10-07
Supplement: GRL-45-10619-s001.pdf [file GRL-45-10619-s001.pdf]

1

2

*Geophysical Research Letters*

3

Supporting Information for

4

**Exacerbation of the 2013–2016 Pan-Caribbean Drought by Anthropogenic  
Warming**

5

6

D. A. Herrera<sup>1\*</sup>, T. R. Ault<sup>1</sup>, J. T. Fasullo<sup>2</sup>, S. J. Coats<sup>3</sup>, C. M. Carrillo<sup>1</sup>, B. I. Cook<sup>4</sup>,  
7 and A. P. Williams<sup>5</sup>

7

8

<sup>1</sup>Department of Earth and Atmospheric Sciences, Cornell University, Ithaca, 14853,  
9 NY, USA.

9

10

<sup>2</sup>Climate and Global Dynamics Division, National Center for Atmospheric Research,  
11 3090 Center Green Dr., Boulder, CO, 80301, USA.

11

12

<sup>3</sup>Woods Hole Oceanographic Institution, 266 Woods Hole Rd., Woods Hole, 02543-  
13 1050, MA, USA.

13

14

<sup>4</sup>NASA Goddard Institute for Space Studies, 2880 Broadway, New York, NY, USA.

15

<sup>5</sup>Lamont-Doherty Earth Observatory of Columbia University, 61 Route 9W,  
16 Palisades, 10964, NY, USA.

16

17 **Contents of this file**

18

Text S1 to S8

19

Figures S1 to S8

20

Tables S1 to S3

## 21 **Introduction**

22 This document further describes the methods and findings of our work. We have  
23 included a more comprehensive description of the metrics we used here to estimate the  
24 contributions of anthropogenic warming to the Pan-Caribbean drought.

## 25 **S1. Climate data**

26 The observed and simulated climate products we used to calculate PET and scPDSI  
27 are listed in the Tables S1 and S2. Because of the relatively coarse horizontal  
28 resolution of the current gridded climate products, which varies from 0.5° to 2.5° (~55  
29 km to ~280 km, respectively) and fails to resolve many of the Lesser Antilles (Jury et  
30 al., 2007; Dai, 2011; 2013; van der Schrier et al., 2013; Cook et al., 2015), we used  
31 statistically-downscaled monthly precipitation data from the Global Precipitation  
32 Climatology Centre (GPCC) “combined product” (available at:  
33 <https://www.esrl.noaa.gov/psd/data/gridded/data.gpcc.html>)(Schneider et al., 2015a,b),  
34 and temperature fields ( $T_{min}$ ,  $T_{mean}$ , and  $T_{max}$ ) from the Berkeley Earth Surface  
35 Temperature (BEST) (Rohde et al., 2013). Wind speed and net radiation data were  
36 obtained from National Centers for Environmental Predictions–National Center for  
37 Atmospheric Research (NCEP–NCAR) (Kalnay et al., 1996) and the Japanese 55-year  
38 (JRA-55) (Ebita et al., 2011) reanalyses, and were bi-linearly interpolated to a  
39 common resolution of 4 km. The validation of downscaled products and further details  
40 of the downscaling and bias-correction procedures we used are described in the  
41 Supporting Information and in Herrera and Ault (2017). We also computed alternate  
42 PET and scPDSI records based on data from the Climatic Research Unit version  
43 TS4.01 (CRU vTS4.01) (Harris et al., 2014) and found that results were nearly  
44 identical to those reported here. To carefully assess the role of radiative flux on  
45 drought variability, we used observed surface radiation (up and down, shortwave and  
46 long wave) and cloud-cover data from the Clouds and Earth’s Radiant Energy System  
47 (CERES) (Loeb et al., 2012) at 1° geographic resolution spanning January  
48 2001/December 2016. CERES data were not used to calculate PET nor scPDSI, but  
49 rather to conduct a complementary analysis of observed radiative fluxes during the  
50 Pan-Caribbean drought.

51 Simulated temperature data ( $T_{min}$  and  $T_{max}$ ) were obtained from the Coupled Model  
52 Intercomparison Project Phase 5 (CMIP5) (Taylor et al., 2012) and are listed in Table  
53 S2. Models were selected based solely on the availability of monthly  $T_{min}$  and  $T_{max}$  data  
54 during the study interval. We used temperature data from the archive’s historical  
55 simulations from 1950 to 2005, appended to the Representative Concentrations  
56 Pathway 8.5 (RCP8.5) to cover 2006/2016. Pre-industrial control and naturally-forced  
57 historical simulations were used as a benchmark to estimate the contribution of  
58 anthropogenic-forcing to scPDSI and PET-anomalies. CMIP5 data of precipitation, net  
59 radiation, wind speed, and soil moisture were further used to assess the consistency of  
60 scPDSI with simulated soil moisture in terms of interannual variability and long-term  
61 trends. CMIP5 model data used in this work were obtained from <https://esgf->

62 [node.llnl.gov/search/esgf-llnl/](http://node.llnl.gov/search/esgf-llnl/), and in contrast to GPCP and BEST, CMIP5 climate  
63 data were not downscaled.

## 64 **S2. The self-Calibrating Palmer Drought Severity Index**

65 The original PDSI consists of a simple water balance model that uses precipitation and  
66 PET as moisture supply and demand, respectively, coupled with a two-layer soil  
67 model (Palmer, 1965). Despite its successful use in diagnosing drought during recent  
68 decades, the PDSI yields inconsistent results across climates (Alley, 1984). This issue  
69 is largely due to the constant duration factors in the original PDSI formulation, which  
70 were empirically derived from stations in the central US (Palmer, 1965; Alley, 1984;  
71 Wells et al., 2004). scPDSI addresses this limitation by automatically calculating  
72 duration factors based on local climate conditions during a determined calibration  
73 period (Wells et al., 2004). The PDSI's calibration period is the interval used to  
74 establish the normal hydroclimatic conditions for a specific location (Palmer, 1965),  
75 and hence partially controls the variance of the index. scPDSI is calculated with the  
76 same basic formulation as the original PDSI as:

$$77 X_i = pX_{i-1} + qZ_i, \quad (1)$$

78 where  $X_i$  is the index value in month  $i$ ,  $X_{i-1}$  is the index of the previous month,  $p$  and  $q$   
79 are the duration factors, and  $Z_i$  is the current moisture anomaly. The duration factors  
80 determine the autocorrelation of the PDSI by assigning different weights to  $X_{i-1}$  and  $Z_i$   
81 to determine the current index. As suggested in Dai (2011; 2013), we used a  
82 1950/1980 calibration period in our scPDSI computations because the anthropogenic  
83 signal is more pronounced after the 1980s. However, because the JRA-55 reanalysis  
84 spans 1958/near present, we used a 1958/1980 period in our estimations with JRA-55.  
85 Further details on how we calculated scPDSI are described by Herrera and Ault  
86 (2017).

## 87 **S3. The FAO reference evapotranspiration**

88 We used a modified version of the original Penman-Monteith (PM) method, as used  
89 by the UN Food and Agricultural Organization (FAO) (Allen et al., 1998). We  
90 selected this method because it requires fewer inputs for its computation as compared  
91 to the original PM method (Penman, 1948; Monteith, 1965; Allen et al., 1998), which  
92 is advantageous for regions where climate data are sparse such as the Caribbean. The  
93 theoretical basis of the FAO-PM method lies in an idealized grass-surface with a  
94 permanent water supply and 0.12 m height. It also assumes a soil resistance of  $70 \text{ s m}^{-1}$ ,  
95 and a surface albedo of 0.23 (Allen et al., 1998). Formally, PET is calculated with  
96 the following equation:

$$97 PET = \frac{0.408\Delta(Rn-G) + \gamma \frac{900}{T+273.16} U_2 (e_s - e_a)}{\Delta + \gamma(1+0.34U_2)}, \quad (2)$$

98 where,

$$99 \quad U_2 = U_{10} \frac{\ln(128)}{\ln(661.3)}$$

100  $PET$  is the crop reference evapotranspiration ( $\text{mm day}^{-1}$ ),  $R_n$  is the net radiation ( $\text{MJ}$   
101  $\text{m}^{-2} \text{d}^{-1}$ ),  $T$  is the average temperature at 2 m height ( $^{\circ}\text{C}$ ),  $G$  is the soil heat flux density  
102 ( $\text{MJ m}^{-2} \text{d}^{-1}$ ),  $U_2$  is the wind speed measured (or estimated from  $U_{10}$ ) at 2 m height ( $\text{m}$   
103  $\text{s}^{-1}$ ),  $U_{10}$  is the wind speed measured at 10 m height ( $\text{m s}^{-1}$ ),  $e_s - e_a$  ( $e_s - e_a$ ) is the  
104 vapor pressure deficit measured at 2 m height (kPa),  $\Delta$  is the slope of the vapor  
105 pressure curve ( $\text{kPa } ^{\circ}\text{C}^{-1}$ ),  $\gamma$  is the psychrometric constant ( $\text{kPa } ^{\circ}\text{C}^{-1}$ ), 900 is the  
106 numerator coefficient for the reference crop ( $\text{kJ}^{-1} \text{kg K d}^{-1}$ ), and 0.34 is the  
107 denominator coefficient for the reference crop ( $\text{s m}^{-1}$ ) (Allen et al., 1998). In contrast  
108 to previous studies that used this method for calculating PET (Cook et al., 2015; 2016;  
109 Karnauskas et al., 2016), we estimated gridded saturated vapor pressure ( $e_s$ ) using our  
110 downscaled and bias-corrected  $T_{max}$  and  $T_{min}$  products with the following equation  
111 (Allen et al., 1998):

$$112 \quad e(T) = 0.6108 \exp \left[ \frac{17.27 T}{T + 237.3} \right], \quad (3)$$

113 where  $e(T)$  is the vapor pressure (kPa) as a function of the air temperature, and  $T$  is  
114 the air temperature in degrees Celsius ( $^{\circ}\text{C}$ ). The actual vapor pressure ( $e_a$ ) was also  
115 obtained with Eq. (3) but using our downscaled  $T_{min}$  instead of dew-point temperature  
116 because we wanted to be consistent with ( $e_s$ ), which was estimated with our  
117 downscaled temperature datasets. Also, we found that this simplification did not have  
118 meaningful impact on the results, as, when we calculated PET from reanalysis data,  
119 the Caribbean PET record was similar regardless of whether we calculated ( $e_a$ ) from  
120  $T_{min}$  or specific humidity. Furthermore, since we used our downscaled temperature  
121 datasets for these computations, the topographic influence to vapor pressure was  
122 therefore taken into account. This PET dataset is the same we used in Herrera and Ault  
123 (2017), and is currently available upon request.

#### 124 **S4. Anthropogenic contributions to drought severity**

125 The contributions of anthropogenic warmth to the Pan-Caribbean drought were  
126 estimated using an array of observed gridded climate data, which were combined to  
127 validate the consistency of our findings. Specifically, we used the following  
128 combinations of (a) precipitation, (b) temperature ( $T_{min}$ ,  $T_{mean}$ , and  $T_{max}$ ), and (c) net-  
129 radiation (if available), total cloud cover, and wind speed to calculate PET and  
130 scPDSI:

131 a. GPCP “combined product”, b. BEST, and c. JRA-55 reanalysis.

132 a. GPCP “combined product”, b. BEST, and c. NCEP-NCAR reanalysis.

133 a., b., and c. CRU TS4.01

134 a. and b. CRU TS4.01, and c. JRA-55 reanalysis.

135 From each combination, we obtained the following contributions:



136 (1) ~14%, (2) ~16%, (3) ~15%, (4) ~13%,  
137 with a mean of ~14.5% and standard deviation of ~1.12%.

138 Contributions on each grid-cell were estimated using the following Equation:

139

$$140 \quad C = \left( 1 - \left( \frac{PDSIdet}{PDSIor} \right) \right) * 100 \quad , \quad (4)$$

141

142 where C is the anthropogenic contribution, PDSIdet is PDSI calculated with adjusted  
143 temperatures (i.e., after the removal of the anthropogenic warming signal), while  
144 PDSIor is PDSI calculated using unadjusted temperature records.

## 145 **S5. Statistical downscaling and validation of downscaled products**

146 The downscaling method applied in this work is the same as in Herrera and Ault  
147 (2017), which similar to the “delta method” implemented by Mosier et al. (2014). To  
148 downscale temperature, we first calculated the anomalies of BEST dataset at its native  
149 resolution (1° lat/lon). Anomalies of maximum, minimum, and mean monthly  
150 temperatures were calculated with respect to the 1950–1980 climatology because the  
151 anthropogenic signal on temperature is more pronounced after the 1980s (Dai and  
152 Zhao, 2016; Zhao and Dai, 2016). These anomalies were then bilinearly interpolated to  
153 4 km, and were then added to the WorldClim climatologies to generate downscaled  
154 temperature products with a spatial resolution of 4 km. Finally, we adjusted the annual  
155 temperature seasonality (WorldClim’s standard deviation) so they match the  
156 WorldClim annual cycle.

157 To downscale precipitation, we applied a two-step using CHIRPS: 1) we re-gridded  
158 the original GPCC V7 dataset to match the resolution of CHIRPS (0.05° or ~6 km),  
159 and we then corrected the variances and means of GPCC so that they match with  
160 CHIRPS during the overlapping period from January 1981 to December 2015; 2)  
161 precipitation anomalies were calculated as the monthly fraction with respect to the  
162 1950–1980 climatology; 3) these anomalies were bilinearly-interpolated and then  
163 aggregated to the WorldClim climatology to get a final downscaled product of 4 km  
164 (Herrera and Ault, 2017).

165 As in Herrera and Ault (2017), we validated our downscaled products before using  
166 them in our anthropogenic contribution estimations. To do so, we calculated the  
167 Spearman rank correlation and root-mean-square-errors (RMSE) between 38 weather  
168 stations and underlying grid cells for precipitation, and with 20 stations for mean  
169 temperature (Fig S3). Most of the weather stations used are from the Global Historical  
170 Climatology Network (GHCN), versions 2 and 3. As shown in Fig. S4, correlation  
171 coefficients between downscaled monthly precipitation and GHCN station range  
172 between  $r = 0.76$  and  $r = 0.97$ , with an average of 0.89 over the Caribbean and  
173 northern South America. In terms of RMSE, we found the lowest value with the  
174 Maracaibo–Los Pozos station in Venezuela (RMSE = 27mm), and the highest in  
175 Caucagua, also in Venezuela (RMSE = 79mm). In terms of correlation coefficients

176 and RMSE values with temperature fields ( $T_{min}$ ,  $T_{mean}$ , and  $T_{max}$ ), these were close to  
177 what we found with precipitation. The higher biases in mean temperature were found  
178 over mountainous regions in Hispaniola Island (RMSE = 0.91°C), and northern South  
179 America (RMSE = 0.89°C). Similar results were observed with monthly minimum and  
180 maximum temperature means, with RMSE ranging from 0.79° to 1.12°C.

## 181 **S6. ENSO-Caribbean drought**

182 Some of the worst droughts in the Caribbean have been linked to the warm phase of El  
183 Niño–Southern Oscillation (ENSO; Peters, 2010; Blunden et al. 2016), including the  
184 1997–1998, 2009–2010, and the 2013–2016 Pan-Caribbean drought. Although the  
185 dynamics between ENSO and Caribbean drought is not yet well constrained, previous  
186 studies have suggested that a persistent subsidence over northern South America could  
187 be responsible of the precipitation deficits observed during El Niño (Giannini et al.  
188 2001a,b). In contrast, the usually wetter conditions observed in northwestern Cuba  
189 (e.g., Herrera and Ault, 2017), could be due to an increased intrusion of frontal  
190 systems during the boreal winter, when El Niño reaches its maximum intensity (e.g.,  
191 Schultz et al. 1998; Giannini et al. 2001a,b). However, as described in Jury et al.  
192 (2007) and Herrera and Ault (2017), there is a seasonal dependency on ENSO effects  
193 to Caribbean precipitation. For example, during El Niño years precipitation deficits in  
194 the Caribbean are noticeable in early boreal autumn (ASO), when El Niño usually  
195 strengthens. In contrast, spring-summer (MJJ) of the year when El Niño is  
196 diminishing, it is usually associated to an even above-normal precipitation (Giannini et  
197 al. 2001a; Jury et al. 2007; Herrera and Ault, 2017). In addition, there is also a major  
198 geographic variability on ENSO effects to Caribbean precipitation (Jury et al. 2007;  
199 Herrera and Ault, 2017) (Fig. S5). ENSO seems to have a stronger influence in  
200 Western Caribbean precipitation variability (e.g., Cuba, Jamaica, and western  
201 Hispaniola Island), while the North Atlantic Oscillation (NAO)—although weaker—  
202 seems to have a more pronounced influence in Eastern-southeastern Caribbean (e.g.,  
203 SE Lesser Antilles) (Jury et al. 2007). This is consistent with a recent study, in which  
204 the authors have found that ENSO effects to drought variability in Puerto Rico is not  
205 significant (Torres-Varcárcel, 2018).

## 206 **S7. Observed surface radiative flux anomalies**

207 Radiative changes during the Pan-Caribbean drought appear to have also played a role  
208 in its severity. Between 2013 and 2016, the average downwelling long-wave radiation  
209 (RLI) anomaly was 1.03 Wm<sup>-2</sup>, while the downwelling short-wave radiation (RSI) was  
210 1.84 Wm<sup>-2</sup>. However, in 2015 when the drought peaked, RLI anomaly averaged 2.59  
211 Wm<sup>-2</sup> and RSI anomaly 3.22 Wm<sup>-2</sup>. Above-normal anomalies in upwelling long and  
212 short-wave radiative fluxes (RLO and RSO) were also observed during the drought,  
213 with 1.2 and 0.11 Wm<sup>-2</sup>, respectively. Given the relatively short time span covered by  
214 CERES (2001–present) it was not possible to assess the direct impact of anthropogenic  
215 climate change on surface radiative flux anomalies using this dataset. However, these  
216 analyses provide further insights into the radiative characteristics of the Pan-Caribbean

217 drought. Additionally, CERES' cloud's fraction and optical depth reveal a below-  
218 normal cloud coverage and a persistent decrease in deep-convection across the  
219 Caribbean (Figs. S7 and S8), consistent with observed radiative flux and precipitation  
220 anomalies during the Pan-Caribbean drought.

## 221 **S8. Supporting references**

222 Bosart L. F., 1998: Planetary and synoptic-scale signatures associated with Central  
223 American cold surges. *Mon Wea Rev* 126:5–27.  
224 Giannini, A., M. A. Cane, and Y. Kushnir, 2001a: Interdecadal changes in the ENSO  
225 teleconnection to the Caribbean region and the North Atlantic Oscillation. *J. Climate*,  
226 14, 2867–2879, doi:10.1175/1520-0442(2001)014<2867:ICITET.2.0.CO;2.  
227 ———, J. C. Chiang, M. A. Cane, Y. Kushnir, and R. Seager, 2001b: The ENSO  
228 teleconnection to the tropical Atlantic Ocean: Contributions of the remote and local  
229 SSTs to rainfall variability in the tropical Americas. *J. Climate*, 14, 4530–4544,  
230 doi:10.1175/1520-0442(2001)014<4530:TETTTT.2.0.CO;2.Schultz DM, Bracken WE,  
231 Peters E. J., 2015: The 2009/2010 Caribbean drought: A case study. *Disasters* 39:738–  
232 761.  
233 Torres-Varcárcel A. R., 2018: Teleconnections between ENSO and rainfall and  
234 drought in Puerto Rico. *Int J of Climatol* doi:10.1002/joc.5444.

235 SUPPORTING FIGURES

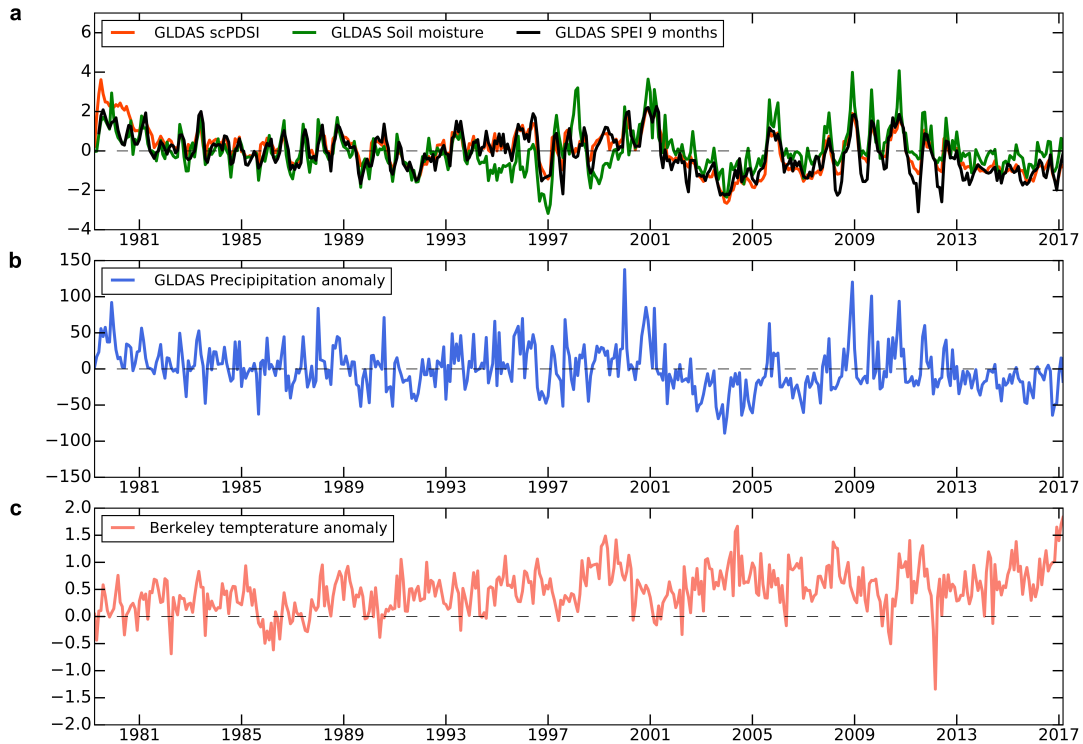

236 **Figure S1.** Water balance estimates using data from the Global Land Data  
237 Assimilation System (GLDAS). The metrics used here: (a) soil moisture anomalies  
238 (GLDAS Soil moisture), the self-calibrating Palmer Drought Severity Index (scPDSI;  
239 GLDAS scPDSI) and the Standardized Precipitation-Evapotranspiration Index (SPEI;  
240 GLDAS SPEI 9 months). All water balance metrics are consistent in terms of  
241 hydroclimate trends and variability during the 1979–2017 period. scPDSI and SPEI  
242 were calculated using precipitation data from GLDAS (b), and temperature from the  
243 Berkeley dataset (c). Precipitation and temperature anomalies are shown in mm and  
244 Celsius degrees, respectively.

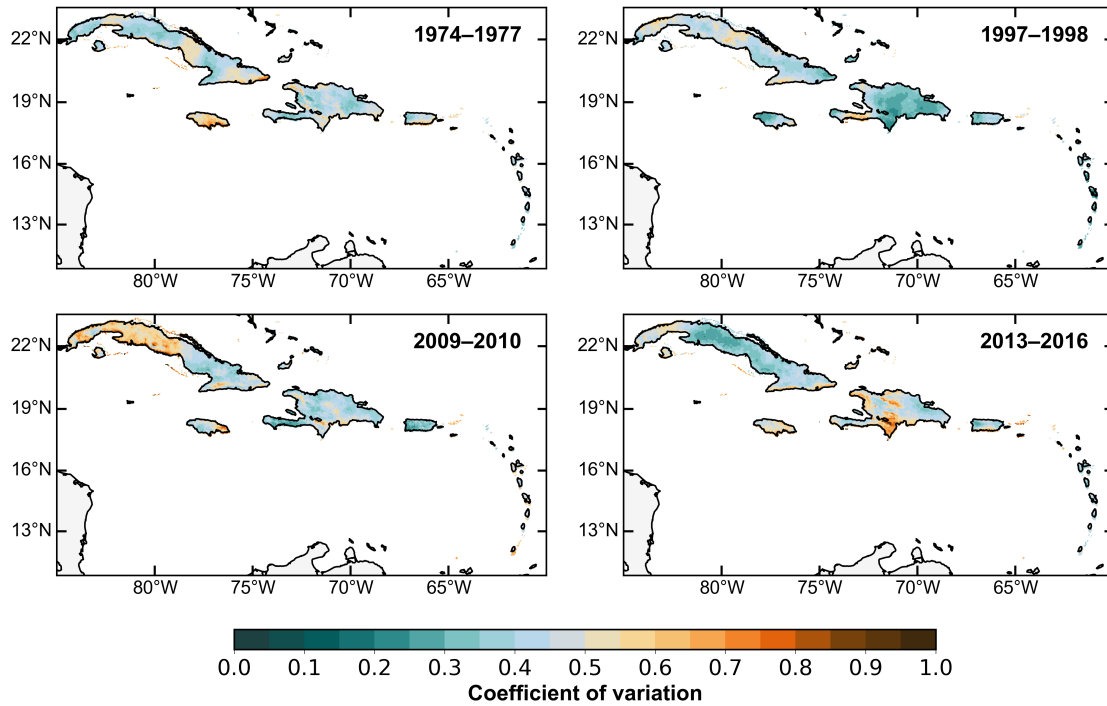

245 **Figure S2.** Coefficient of variation in precipitation anomalies during some of the  
 246 worst droughts in the Caribbean. In 2013–2016, lower coefficients of variation are  
 247 observed over the regions with the highest anthropogenic contributions on the drought.

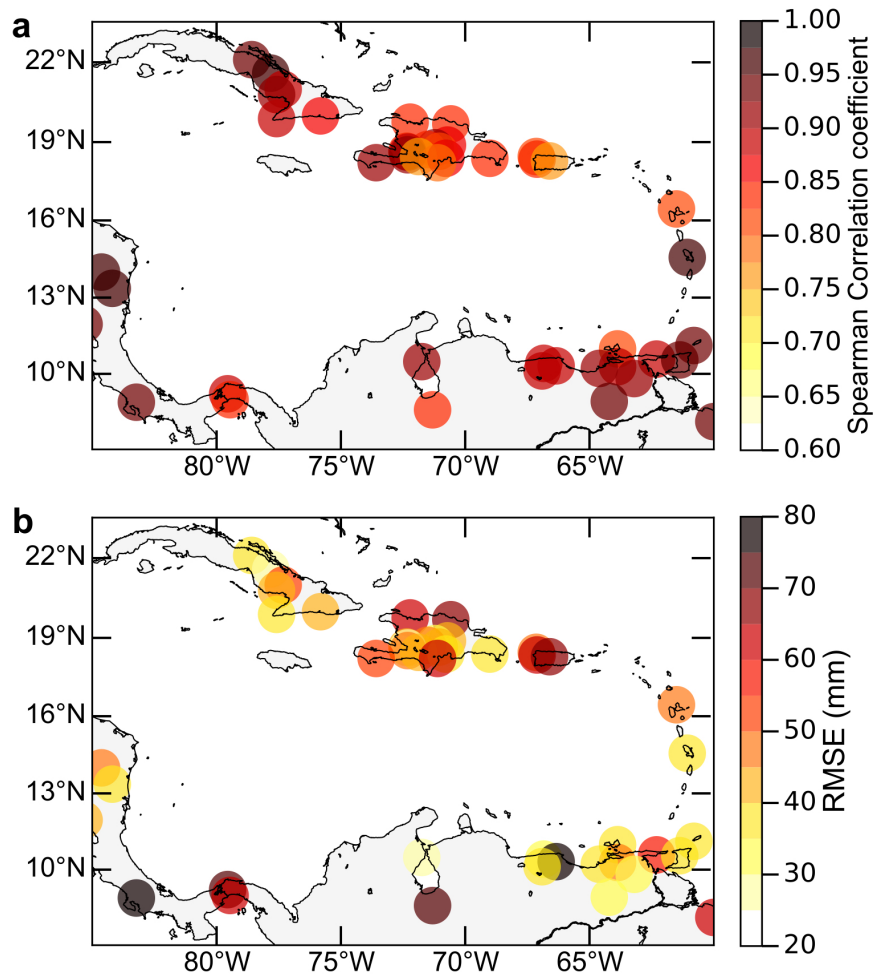

248 **Figure S3.** (a) Spearman rank correlation coefficients and (b) RMSE between our  
 249 downscaled precipitation product and GHCN station data. The intervals of these  
 250 correlations and RMSEs vary depending on the length of GHCN used. However, we  
 251 selected stations with at least 20 years of continuous data.

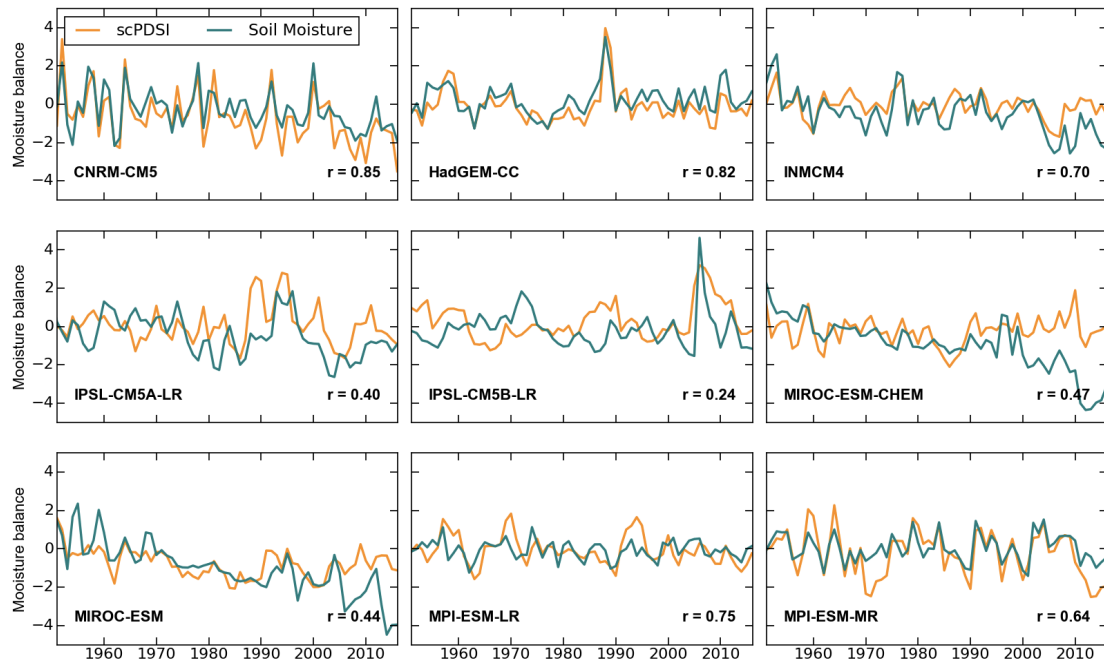

252 **Figure S4.** Simulated scPDSI and soil moisture anomalies during 1950–2016 from  
 253 CMIP5. scPDSI significantly correlates with soil moisture anomalies in spite of the  
 254 simple water balance model it uses. The significant correlations between these  
 255 moisture balance indicators suggest that CO<sub>2</sub> fertilization plays a minor role in  
 256 affecting PET in the Caribbean during the 1950–2016 interval.

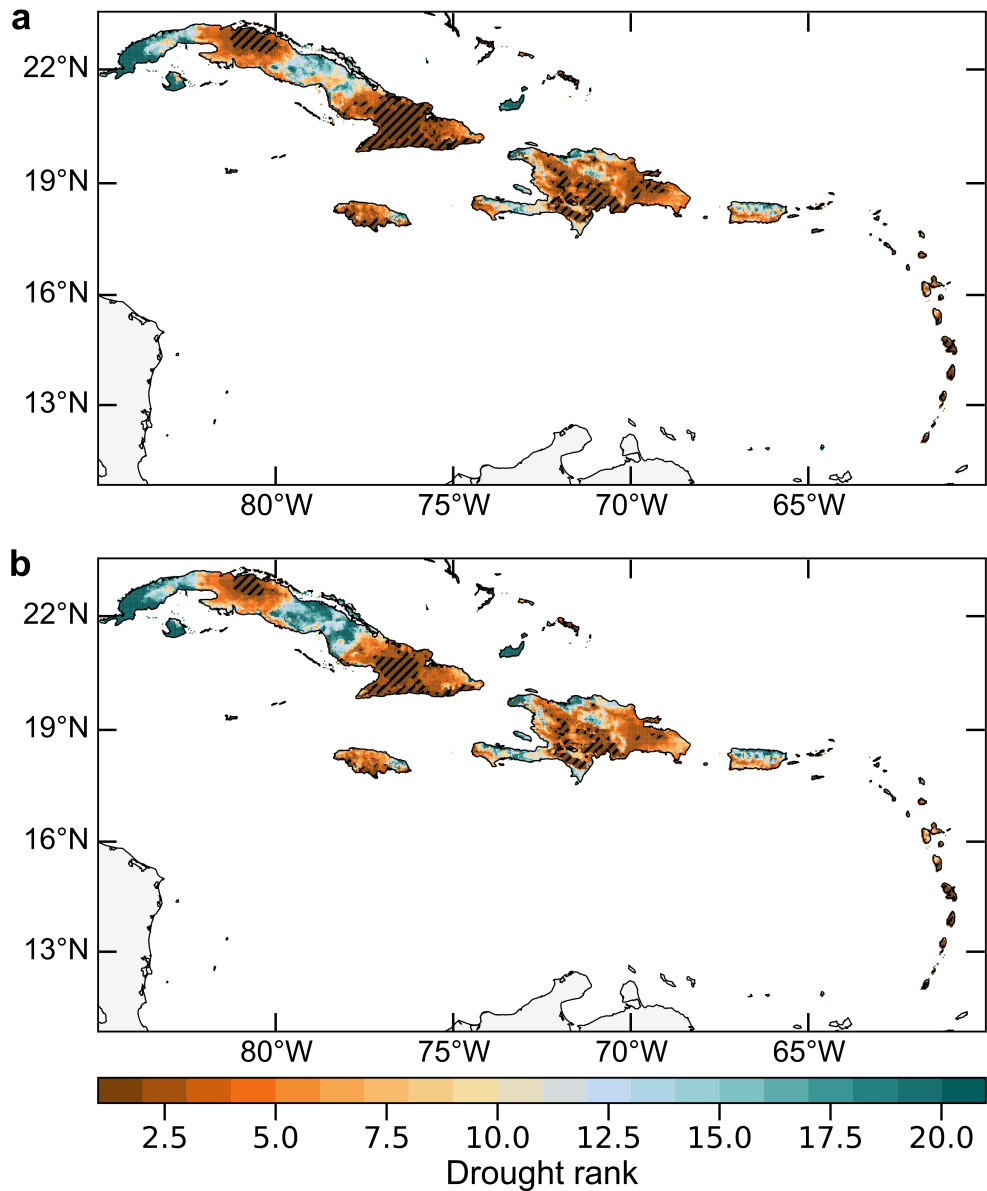

257 **Figure. S5.** Drought ranks of scPDSI estimated with the observed trend in  
 258 temperature and adjusted temperatures. **(a)** Drought rankings of using the observed  
 259 temperature trend. The hatching refers to the area where the Pan-Caribbean drought  
 260 was record breaking any year between 2013 and 2016, which is nearly 32%. **(b)** As in  
 261 (a) but using adjusted temperatures to calculate PET and scPDSI. In this case, the area  
 262 where the Pan-Caribbean drought was record-breaking is ~21%.



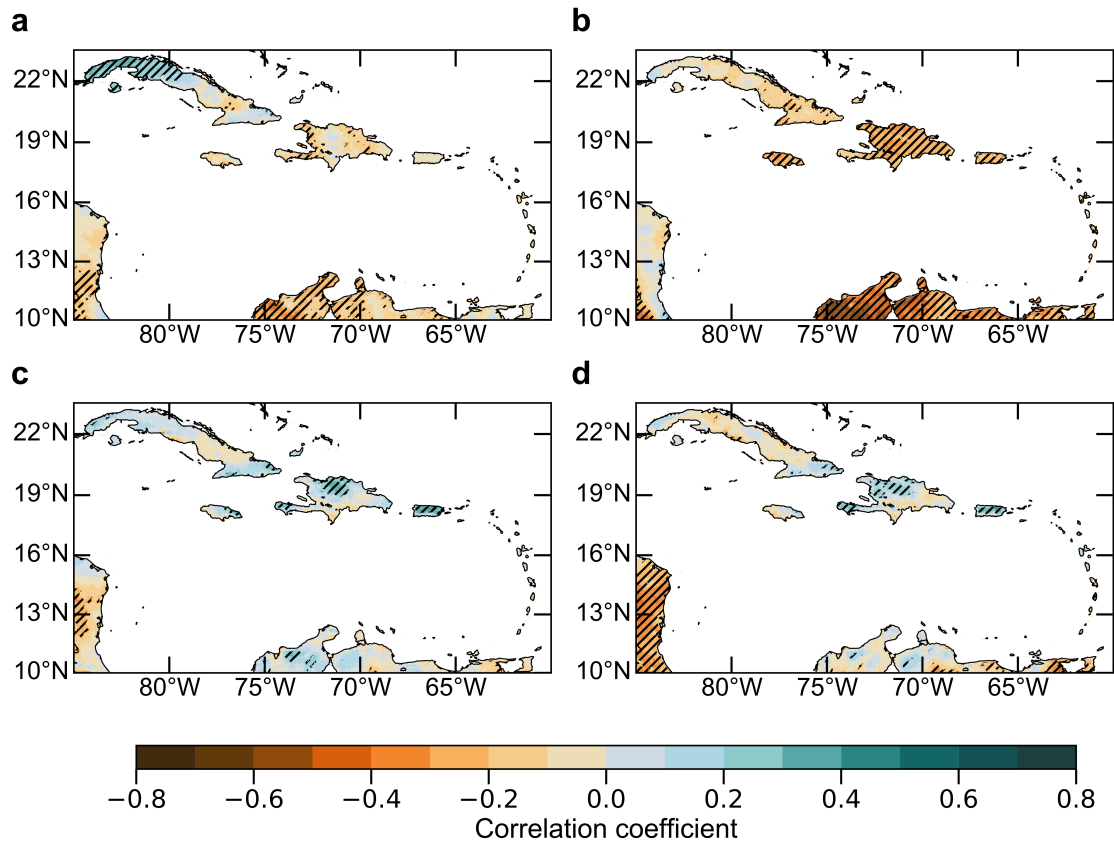

263 **Figure S6.** Correlations coefficients between our downscaled scPDSI and sea surface  
 264 temperature anomalies (SSTAs) in the Niño-3.4 region. **(a)** In MJJ, **(b)** in ASO. **(c)**,  
 265 **(d)** As in (a) and (b) but with SSTAs in the tropical North Atlantic. The hatched areas  
 266 are statistically significant correlations at the 95% level.

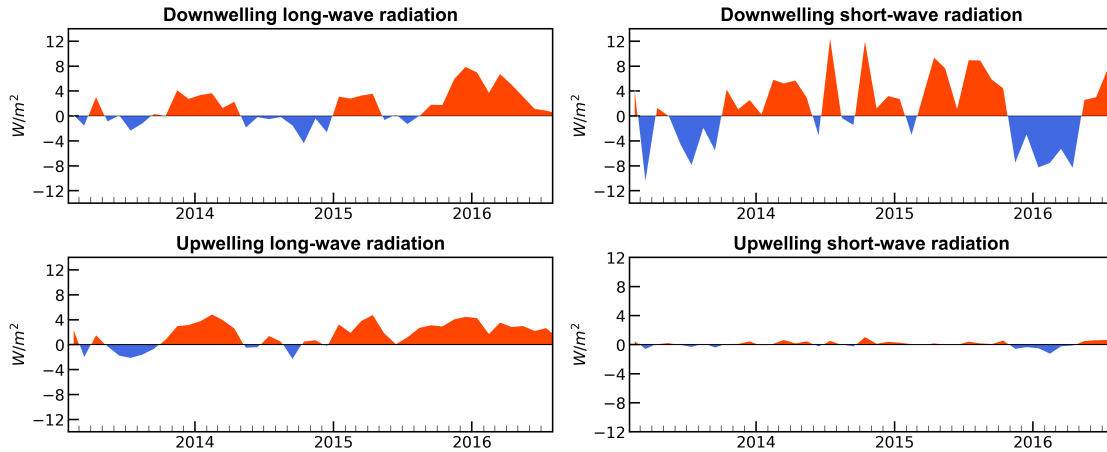

267 **Figure S7.** Radiative flux anomalies during the Pan-Caribbean drought observed from  
 268 the NASA's CERES data. As expected during dry intervals, there is an increase in  
 269 incoming short-wave radiation likely due to lower than normal cloud cover. However,  
 270 during the recent Pan-Caribbean drought anomalously high incoming long-wave  
 271 radiation was observed, which is mostly due to the rise of anthropogenic greenhouse  
 272 gas concentrations, with an averaged departure of  $0.8 \text{ W m}^{-2}$  between January 2013  
 273 and December 2016 (as estimated relative to the 2001–2016 CERES climatology).

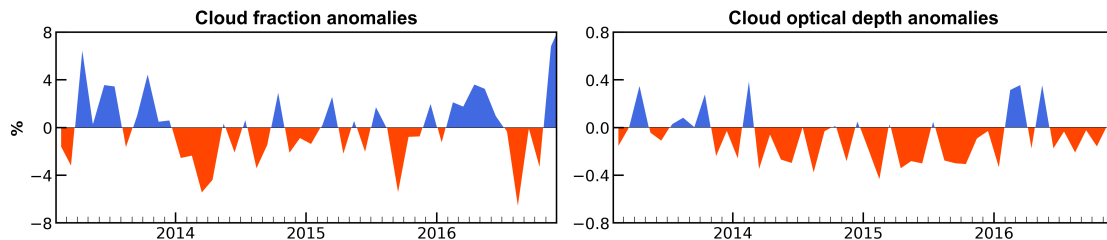

274 **Figure S8.** Cloud fraction and cloud optical depth anomalies during the Pan-  
 275 Caribbean drought observed from the NASA's CERES data. During the Pan-  
 276 Caribbean drought a below-normal cloud fraction is observed across the Caribbean.  
 277 However, the persistent decrease in deep convection, as evaluated from below-normal  
 278 cloud optical depth anomalies, is the main characteristic of the drought. As in FIG. S6  
 279 we estimated these anomalies as departures from the 2001–2016 CERES climatology.

280 **SUPPORTING TABLES**281 **Table S1.** Observed climate datasets.

| <b>Variable</b>                                                                                             | <b>Dataset</b>          | <b>Native resolution</b> | <b>Period used</b>      | <b>Reference</b>                   |
|-------------------------------------------------------------------------------------------------------------|-------------------------|--------------------------|-------------------------|------------------------------------|
| <b>Precipitation</b>                                                                                        | *GPCC                   | 1°                       | 1949–2016               | Schneider et al. (2014)            |
|                                                                                                             | *CHIRPS                 | 0.05°                    | 1981–2016               | Funk et al. (2015)                 |
|                                                                                                             | *CRU TS4.01             | 0.5°                     | 1949–2016               | Harris et al. (2014)               |
|                                                                                                             | WorldClim (Climatology) | ~1 km                    | 1950–2000               | Hijmans et al. (2005)              |
|                                                                                                             | *CHELSA (Climatology)   | ~1 km                    | 1979–2013               | Karger et al. (2016)               |
| <b>Temperature</b>                                                                                          | *BEST                   | 1°                       | 1949–2016               | Rohde et al. (2013)                |
|                                                                                                             | *NCEP–NCAR Reanalysis   | 2.5°                     | 1949–2016               | Kalnay et al. (1996)               |
|                                                                                                             | *CRU TS4.01             | 0.5°                     | 1949–2016               | Harris et al. (2014)               |
|                                                                                                             | WorldClim (Climatology) | ~1 km                    | 1950–2000               | Hijmans et al. (2005)              |
| <b>Net radiation</b>                                                                                        | *JRA-55 Reanalysis      | ~1.25°                   | 1958–2016               | Ebita et al. (2011)                |
|                                                                                                             | *NCEP–NCAR Reanalysis   | ~1.8°                    | 1949–2016               | Kalnay et al. (1996)               |
|                                                                                                             | *CRU TS4.01             | 0.5°                     | (Climatology)           | Harris et al. (2014)               |
|                                                                                                             | *CERES                  | 1°                       | 2001–2016               | Loeb et al. (2012)                 |
| <b>Wind speed</b>                                                                                           | *NCEP–NCAR Reanalysis   | 2.5°                     | 1981–2010 (Climatology) | Kalnay et al. (1996)               |
|                                                                                                             | *CRU TS4.01             | 0.5°                     | 1949–2016               | Harris et al. (2014)               |
| <b>Vapor pressure</b>                                                                                       | Derived from *BEST      | 1°                       | 1949–2016               | Rohde et al. (2013)                |
|                                                                                                             | *CRU TS4.01             | 0.5°                     | 1949–2016               | Harris et al. (2014)               |
| <b>Elevation</b>                                                                                            | WorldClim               | ~1 km                    | - -                     | Hijmans et al. (2005)              |
| <b>Available Water Holding Capacity</b>                                                                     | *IGBP–DIS               | 0.08°                    | - -                     | Global Soil Data Task Group (2000) |
| <b>Radiative fluxes</b>                                                                                     | *CERES                  | 1°                       | 2001–2016               | Loeb et al. (2012)                 |
| <b>*GPCC: Global Precipitation Climatology Centre Version 7.</b>                                            |                         |                          |                         |                                    |
| <b>*CRU: Climatic Research Unit version TS4.01</b>                                                          |                         |                          |                         |                                    |
| <b>*CHIRPS: Climate Hazards Group InfraRed Precipitation with Station data.</b>                             |                         |                          |                         |                                    |
| <b>*CHELSA: Climatologies at High resolution for Earth’s land Surface Areas.</b>                            |                         |                          |                         |                                    |
| <b>*BEST: Berkeley Earth Surface Temperature.</b>                                                           |                         |                          |                         |                                    |
| <b>*NCEP–NCAR: National Centers for Environmental Predictions–National Center for Atmospheric Research.</b> |                         |                          |                         |                                    |
| <b>*IGBP–DIS: International Geosphere–Biosphere Programme Data and Information Services.</b>                |                         |                          |                         |                                    |
| <b>*CERES: Clouds and Earth’s Radiant Energy Systems.</b>                                                   |                         |                          |                         |                                    |
| <b>*JRA-55: Japanese 55-year Reanalysis.</b>                                                                |                         |                          |                         |                                    |

282

283 **Table S2.** List of the CMIP5 models used in this work. From these models, we use monthly means of daily maximum and minimum  
 284 temperature data at 2 m (tasmax and tasmin, respectively), radiation data (rlds, rlus, rsds, and rsus), and soil moisture data (mrso) from  
 285 historical period (1949–2005), RCP8.5 (2006–2016), and pre-industrial control (1949–2016). We use one member from each model.

| Model          | Resolution<br>(lat./lon.) | Variables used |        |    |      |      |      |      |      |         |
|----------------|---------------------------|----------------|--------|----|------|------|------|------|------|---------|
|                |                           | Tasmx          | Tasmin | Pr | Rlds | Rlus | Rsds | Rsus | mrso | sfcWind |
| BCCM-CSM1-1-M  | 1.1215° x 1.125°          | x              | x      | x  |      |      |      |      |      |         |
| CESM1-BGC      | 0.9424° x 1.25°           | x              | x      | x  |      |      |      |      |      |         |
| CESM1-CAM5     | 0.9424° x 1.25°           | x              | x      | x  |      |      |      |      |      |         |
| CNRM-CM5       | 1.4008° x 1.4063°         | x              | x      | x  | x    | x    | x    | x    | x    | x       |
| CNRM-CM5-2     | 1.4008° x 1.4063°         | x              | x      | x  | x    | x    | x    | x    |      | x       |
| CMCC-CESM      | 3.711° x 3.75°            | x              | x      | x  |      |      |      |      |      |         |
| CMCC-CM        | 0.7484° x 0.75°           | x              | x      | x  |      |      |      |      |      |         |
| CMCC-CMS       | 1.8652° x 1.875°          | x              | x      | x  |      |      |      |      |      |         |
| GFDL-CM3       | 2° x 2.5°                 | x              | x      | x  |      |      |      |      |      |         |
| GFDL-ESM2G     | 2.0225° x 2.5°            | x              | x      | x  |      |      |      |      |      |         |
| GFDL-ESM2M     | 2.0225° x 2.5°            | x              | x      | x  |      |      |      |      |      |         |
| GISS-E2-H      | 2° x 2.5°                 | x              | x      | x  |      |      |      |      |      |         |
| GISS-E2-R      | 2° x 2.5°                 | x              | x      | x  |      |      |      |      |      |         |
| GISS-E2-H-CC   | 2° x 2.5°                 | x              | x      | x  |      |      |      |      |      |         |
| GISS-E2-R-CC   | 2° x 2.5°                 | x              | x      | x  |      |      |      |      |      |         |
| HADGEM2-CC     | 1.25° x 1.875°            | x              | x      | x  | x    | x    | x    | x    | x    | x       |
| HADGEM2-ES     | 1.25° x 1.875°            | x              | x      | x  | x    | x    | x    | x    |      | x       |
| INMCM4         | 1.5° x 2°                 | x              | x      | x  | x    | x    | x    | x    | x    | x       |
| IPSL-CM5A-LR   | 1.8947° x 3.75°           | x              | x      | x  | x    | x    | x    | x    | x    | x       |
| IPSL-CM5A-MR   | 1.2676° x 2.5°            | x              | x      | x  | x    | x    | x    | x    |      | x       |
| IPSL-CM5B-LR   | 1.8947° x 3.75°           | x              | x      | x  | x    | x    | x    | x    | x    | x       |
| MIROC-ESM-CHEM | 2.7905° x 2.8125°         | x              | x      | x  | x    | x    | x    | x    | x    | x       |
| MIROC-ESM      | 2.7905° x 2.8125°         | x              | x      | x  | x    | x    | x    | x    | x    | x       |
| MRI-CGCM3      | 1.1215° x 1.125°          | x              | x      | x  | x    | x    | x    | x    | x    | x       |
| MPI-ESM-LR     | 1.8652° x 1.875°          | x              | x      | x  | x    | x    | x    | x    | x    | x       |
| MPI-ESM-MR     | 1.8652° x 1.875°          | x              | x      | x  | x    | x    | x    | x    | x    | x       |
| MRI-ESM1       | 1.1215° x 1.125°          | x              | x      | x  | x    | x    | x    | x    |      | x       |
| NORESM1-M      | 1.8947° x 2.5°            | x              | x      | x  |      |      |      |      |      |         |
| NORESM1-ME     | 1.8947° x 2.5°            | x              | x      | x  |      |      |      |      |      |         |

287 **Table S3.** Relative changes in drought area over land: “% of land affected” refers to the  
 288 percentage of land under each drought category; “% relative contribution” refers to the  
 289 estimated relative anthropogenic contribution to the area of each drought category; while  
 290 “Total land area” is the area of each island/region obtained or calculated from CIA  
 291 (2013).

| Region/Island               | Mild-drought area<br>(scPDSI between -1.00 and<br>-1.99) |                                                 | Severe-drought area<br>(scPDSI between -3.00 and<br>-3.99) |                                                 | Total<br>land<br>area<br>(km <sup>2</sup> ) |
|-----------------------------|----------------------------------------------------------|-------------------------------------------------|------------------------------------------------------------|-------------------------------------------------|---------------------------------------------|
|                             | <i>Percentage<br/>of land<br/>affected</i>               | <i>Percentage<br/>relative<br/>contribution</i> | <i>Percentage<br/>of land<br/>affected</i>                 | <i>Percentage<br/>relative<br/>contribution</i> |                                             |
| <b>Caribbean*</b>           | 67                                                       | 7                                               | 28                                                         | 20                                              | 239681                                      |
| <b>Cuba</b>                 | 59                                                       | 18                                              | 22                                                         | 25                                              | 109820                                      |
| <b>Hispaniola</b>           | 76                                                       | 6                                               | 33.5                                                       | 23                                              | 76420                                       |
| <b>Jamaica</b>              | 65                                                       | 11                                              | 25.9                                                       | 24                                              | 10831                                       |
| <b>Lesser<br/>Antilles*</b> | 39                                                       | 19                                              | 37.85                                                      | 13                                              | 9236                                        |
| <b>Puerto Rico</b>          | 68                                                       | 9                                               | 13.6                                                       | 22                                              | 8870                                        |

292 \* Not including Trinidad and Tobago and Barbados.
